# Supplementary material
Source: ML conference proceedings conference paper supplement (https://proceedings.neurips.cc/paper_files/paper/2011/hash/aa169b49b583a2b5af89203c2b78c67c-Abstract.html)
Supplement: Supplementary file [file aa169b49b583a2b5af89203c2b78c67c-Supplemental.zip]

---

# Supplementary Material: Unifying Framework for Fast Learning Rate of Non-Sparse Multiple Kernel Learning

---

**Taiji Suzuki**

Department of Mathematical Informatics  
The University of Tokyo  
Tokyo 113-8656, Japan  
s-taiji@stat.t.u-tokyo.ac.jp

## A Outline of the proof of Theorem 1

Before we go into the rigorous proof of Theorem 1, we describe a brief (but mathematically incorrect) outline of the proof. For simplicity, we assume that the infinity norms of  $\hat{f}$  and  $f^*$  are bounded from above by a constant:  $\|\hat{f}\|_\infty, \|f^*\|_\infty \leq C$ . Write  $\Delta f = \hat{f} - f^*$ . Let  $P_n$  and  $P$  be operators that give the empirical mean and the population means of a function respectively:  $P_n f = \frac{1}{n} \sum_{i=1}^n f(x_i, y_i)$  and  $Pf = \mathbb{E}[f(X, Y)]$ . Then by the definition of  $\hat{f}$ , we have

$$P_n(Y - \hat{f})^2 + \lambda_1^{(n)} \|\hat{f}\|_\psi^2 \leq P_n(Y - f^*)^2 + \lambda_1^{(n)} \|f^*\|_\psi^2. \quad (\text{S-1})$$

On the other hand, we have the following equation:

$$P(Y - f^*)^2 + P(\hat{f} - f^*)^2 = P(Y - \hat{f})^2. \quad (\text{S-2})$$

Summing up Eq. (S-1) and Eq. (S-2), we obtain

$$\begin{aligned} P(f^* - \hat{f})^2 + \lambda_1^{(n)} \|\hat{f}\|_\psi^2 &\leq (P_n - P) \left\{ (Y - f^*)^2 - (Y - \hat{f})^2 \right\} + \lambda_1^{(n)} \|f^*\|_\psi^2 \\ &\leq (P_n - P) \left\{ (-2\epsilon - f^* + \hat{f})(f^* - \hat{f}) \right\} + \lambda_1^{(n)} \|f^*\|_\psi^2. \end{aligned} \quad (\text{S-3})$$

Note that  $|-2\epsilon - f^* + \hat{f}| \leq 2(L+C)$ . Therefore, using the contraction inequality for the Rademacher complexity [2, Theorem 4.12] and Talagrand's concentration inequality (Proposition 6), we have the following upper bound of the first term in the RHS of the above inequality (S-3):

$$\begin{aligned} &(P_n - P) \left\{ (-2\epsilon - f^* + \hat{f})(f^* - \hat{f}) \right\} \\ &\leq \mathcal{O}_P \left( \sum_{m=1}^M \frac{\|\Delta f_m\|_{L_2(\Pi)}^{1-s_m} \|\Delta f_m\|_{\mathcal{H}_m}^{s_m}}{\sqrt{n}} \vee \frac{\|\Delta f_m\|_{L_2(\Pi)}^{\frac{(1-s_m)^2}{1+s_m}} \|\Delta f_m\|_{\mathcal{H}_m}^{\frac{s_m(3-s_m)}{1+s_m}}}{n^{\frac{1}{1+s_m}}} + \sum_{m=1}^M \sqrt{\frac{\log(M)}{n}} \|\Delta f_m\|_{L_2(\Pi)} \right) \\ &\leq \mathcal{O}_P \left( \sum_{m=1}^M \frac{r_m^{-s_m}}{\sqrt{n}} (\|\Delta f_m\|_{L_2(\Pi)} + s_m r_m \|\Delta f_m\|_{\mathcal{H}_m}) \right. \\ &\quad + \sum_{m=1}^M \frac{r_m^{-\frac{s_m(3-s_m)}{1+s_m}}}{n^{\frac{1}{1+s_m}}} (\|\Delta f_m\|_{L_2(\Pi)} + s_m r_m \|\Delta f_m\|_{\mathcal{H}_m}) \\ &\quad \left. + \sum_{m=1}^M \sqrt{\frac{\log(M)}{n}} \|\Delta f_m\|_{L_2(\Pi)} \right) \quad (\because \text{Eq. (S-11), Eq. (S-12)}) \end{aligned} \quad (\text{S-4})$$

$$\begin{aligned}
&\leq \mathcal{O}_p \left\{ \left( \sum_{m=1}^M \frac{r_m^{-2s_m}}{n} \right)^{\frac{1}{2}} \left( \sum_{m=1}^M \|\Delta f_m\|_{L_2(\Pi)}^2 \right)^{\frac{1}{2}} + \left\| \left( \frac{s_m r_m^{1-s_m}}{\sqrt{n}} \right)_{m=1}^M \right\|_{\psi^*} \|\Delta f\|_{\psi} \right. \\
&\quad + \left( \sum_{m=1}^M \frac{r_m^{-\frac{2s_m(3-s_m)}{1+s_m}}}{n^{\frac{2}{1+s_m}}} \right)^{\frac{1}{2}} \left( \sum_{m=1}^M \|\Delta f_m\|_{L_2(\Pi)}^2 \right)^{\frac{1}{2}} + \left\| \left( \frac{s_m r_m^{1-\frac{s_m(3-s_m)}{1+s_m}}}{n^{\frac{1}{1+s_m}}} \right)_{m=1}^M \right\|_{\psi^*} \|\Delta f\|_{\psi} \\
&\quad \left. + \sqrt{\frac{M \log(M)}{n}} \left( \sum_{m=1}^M \|\Delta f_m\|_{L_2(\Pi)}^2 \right)^{\frac{1}{2}} \right\}, \tag{S-5}
\end{aligned}$$

where we used Cauchy-Schwarz inequality and the duality of the  $\psi$ -norm in the last line. Utilizing the relation  $\sum_{m=1}^M \|\Delta f_m\|_{L_2(\Pi)}^2 \leq \frac{1}{\kappa_M} \|\Delta f\|_{L_2(\Pi)}^2$ , Eq. (S-5) implies

$$\begin{aligned}
&(P_n - P) \left\{ (-2\epsilon - f^* + \hat{f})(f^* - \hat{f}) \right\} \\
&\leq \mathcal{O}_p \left( \alpha_1 \|\Delta f\|_{L_2(\Pi)} + \beta_1 \|\Delta f\|_{\psi} + \alpha_2 \|\Delta f\|_{L_2(\Pi)} + \beta_2 \|\Delta f\|_{\psi} + \sqrt{\frac{M \log(M)}{n}} \|\Delta f\|_{L_2(\Pi)} \right) \\
&= \mathcal{O}_p \left( \alpha_1 \|\Delta f\|_{L_2(\Pi)} + \alpha_1 \frac{\beta_1}{\alpha_1} \|\Delta f\|_{\psi} + \alpha_2 \|\Delta f\|_{L_2(\Pi)} + \alpha_2 \frac{\beta_2}{\alpha_2} \|\Delta f\|_{\psi} + \sqrt{\frac{M \log(M)}{n}} \|\Delta f\|_{L_2(\Pi)} \right) \\
&\leq \mathcal{O}_p \left( \alpha_1^2 + \alpha_2^2 + \frac{M \log(M)}{n} \right) + \frac{1}{2} \|\Delta f\|_{L_2(\Pi)}^2 + \frac{1}{2} \left[ \left( \frac{\beta_2}{\alpha_2} \right)^2 + \left( \frac{\beta_2}{\alpha_2} \right)^2 \right] \|\Delta f\|_{\psi}^2. \tag{S-6}
\end{aligned}$$

Here substitute the relation  $\|\Delta f\|_{\psi}^2 \leq (\|\hat{f}\|_{\psi} + \|f^*\|_{\psi})^2 \leq 2(\|\hat{f}\|_{\psi}^2 + \|f^*\|_{\psi}^2)$  into Eq. (S-6), combine Eq. (S-3) and Eq. (S-6), move the terms  $\frac{1}{2} \|\Delta f\|_{L_2(\Pi)}^2$  and  $\left[ \left( \frac{\beta_2}{\alpha_2} \right)^2 + \left( \frac{\beta_2}{\alpha_2} \right)^2 \right] \|\hat{f}\|_{\psi}^2$  to the right hand side, then we obtain the assertion.

## B Relation between Entropy Number and Spectral Condition

Associated with the  $\epsilon$ -covering number, the  $i$ -th entropy number  $e_i(\mathcal{H}_m \rightarrow L_2(\Pi))$  is defined as the infimum over all  $\epsilon > 0$  for which  $N(\epsilon, \mathcal{B}_{\mathcal{H}_m}, L_2(\Pi)) \leq 2^{i-1}$ . If the spectral assumption (A3) holds, the relation (2) implies that the  $i$ -th entropy number is bounded as

$$e_i(\mathcal{H}_m \rightarrow L_2(\Pi)) \leq C i^{-\frac{1}{2s}}, \tag{S-7}$$

where  $C$  is a constant. To bound empirical process a bound of the entropy number with respect to the empirical distribution is needed. The following proposition gives an upper bound of that (see Corollary 7.31 of [5], for example).

**Proposition 4.** *If there exists constants  $0 < s < 1$  and  $C \geq 1$  such that  $e_i(\mathcal{H}_m \rightarrow L_2(\Pi)) \leq C i^{-\frac{1}{2s}}$ , then there exists a constant  $c_s > 0$  only depending on  $s$  such that*

$$\mathbb{E}_{D_n \sim \Pi^n} [e_i(\mathcal{H}_m \rightarrow L_2(D_n))] \leq c_s C (\min(i, n))^{\frac{1}{2s}} i^{-\frac{1}{s}},$$

in particular  $\mathbb{E}_{D_n \sim \Pi^n} [e_i(\mathcal{H}_m \rightarrow L_2(D_n))] \leq c_s C i^{-\frac{1}{2s}}$ .

## C Basic Propositions

The following two propositions are keys to prove Theorem 1. Let  $\{\sigma_i\}_{i=1}^n$  be i.i.d. Rademacher random variables, i.e.,  $\sigma_i \in \{\pm 1\}$  and  $P(\sigma_i = 1) = P(\sigma_i = -1) = \frac{1}{2}$ .

**Proposition 5. [5, Theorem 7.16]** *Let  $\mathcal{B}_{\sigma, a, b} \subset \mathcal{H}_m$  be a set such that  $\mathcal{B}_{\sigma, a, b} = \{f_m \in \mathcal{H}_m \mid \|f_m\|_{L_2(\Pi)} \leq \sigma, \|f_m\|_{\mathcal{H}_m} \leq a, \|f_m\|_{\infty} \leq b\}$ . Assume that there exist constants  $0 < s < 1$  and  $0 < \tilde{c}_s$  such that*

$$\mathbb{E}_{D_n} [e_i(\mathcal{H}_m \rightarrow L_2(D_n))] \leq \tilde{c}_s i^{-\frac{1}{2s}}.$$

Then there exists a constant  $C'_s$  depending only  $s$  such that

$$\mathbb{E} \left[ \sup_{f_m \in \mathcal{B}_{\sigma, a, b}} \left| \frac{1}{n} \sum_{i=1}^n \sigma_i f_m(x_i) \right| \right] \leq C'_s \left( \frac{\sigma^{1-s} (\tilde{c}_s a)^s}{\sqrt{n}} \vee (\tilde{c}_s a)^{\frac{2s}{1+s}} b^{\frac{1-s}{1+s}} n^{-\frac{1}{1+s}} \right). \quad (\text{S-8})$$

**Proposition 6. (Talagrand's Concentration Inequality [6, 1])** Let  $\mathcal{G}$  be a function class on  $\mathcal{X}$  that is separable with respect to  $\infty$ -norm, and  $\{x_i\}_{i=1}^n$  be i.i.d. random variables with values in  $\mathcal{X}$ . Furthermore, let  $B \geq 0$  and  $U \geq 0$  be  $B := \sup_{g \in \mathcal{G}} \mathbb{E}[(g - \mathbb{E}[g])^2]$  and  $U := \sup_{g \in \mathcal{G}} \|g\|_\infty$ , then there exists a universal constant  $K$  such that, for  $Z := \sup_{g \in \mathcal{G}} \left| \frac{1}{n} \sum_{i=1}^n g(x_i) - \mathbb{E}[g] \right|$ , we have

$$P \left( Z \geq K \left[ \mathbb{E}[Z] + \sqrt{\frac{Bt}{n}} + \frac{Ut}{n} \right] \right) \leq e^{-t}.$$

## D Proof of Theorem 1

Let  $r_m > 0$  ( $m = 1, \dots, M$ ) be arbitrary positive reals. Given  $\{r_m\}_{m=1}^M$ , we determine  $U_{n, s_m}^{(m)}(f_m)$  as follows:

$$U_{n, s_m}^{(m)}(f_m) := 3 \left( \frac{r_m^{-s_m}}{\sqrt{n}} \vee \frac{r_m^{-\frac{s_m(3-s_m)}{1+s_m}}}{n^{\frac{1}{1+s_m}}} \right) (\|f_m\|_{L_2(\Pi)} + s_m r_m \|f_m\|_{\mathcal{H}_m}) + \sqrt{\frac{\log(M)}{n}} \|f_m\|_{L_2(\Pi)}.$$

It is easy to see  $U_{n, s_m}^{(m)}(f_m)$  is an upper bound of the quantity  $\frac{\|f_m\|_{L_2(\Pi)}^{1-s_m} \|f_m\|_{\mathcal{H}_m}^{s_m}}{\sqrt{n}} \vee \frac{\|f_m\|_{L_2(\Pi)}^{\frac{(1-s_m)^2}{1+s_m}} \|f_m\|_{\mathcal{H}_m}^{\frac{s_m(3-s_m)}{1+s_m}}}{n^{\frac{1}{1+s_m}}}$  (this corresponds to the RHS of Eq. (S-8)) because

$$\frac{\|f_m\|_{L_2(\Pi)}^{1-s_m} \|f_m\|_{\mathcal{H}_m}^{s_m}}{\sqrt{n}} = \frac{r_m^{1-s_m}}{\sqrt{n}} \left( \frac{\|f_m\|_{L_2(\Pi)}}{r_m} \right)^{1-s_m} \|f_m\|_{\mathcal{H}_m}^{s_m} \quad (\text{S-9})$$

$$\stackrel{(\text{Young})}{\leq} \frac{r_m^{1-s_m}}{\sqrt{n}} \left( (1-s_m) \frac{\|f_m\|_{L_2(\Pi)}}{r_m} + s_m \|f_m\|_{\mathcal{H}_m} \right) \quad (\text{S-10})$$

$$\leq \frac{r_m^{-s_m}}{\sqrt{n}} (\|f_m\|_{L_2(\Pi)} + s_m r_m \|f_m\|_{\mathcal{H}_m}), \quad (\text{S-11})$$

where we used Young's inequality  $a^{1-s_m} b^{s_m} \leq (1-s_m)a + s_m b$  in the second line, and similarly we obtain

$$\begin{aligned} \frac{\|f_m\|_{L_2(\Pi)}^{\frac{(1-s_m)^2}{1+s_m}} \|f_m\|_{\mathcal{H}_m}^{\frac{s_m(3-s_m)}{1+s_m}}}{n^{\frac{1}{1+s_m}}} &\leq \frac{r_m^{-\frac{s_m(3-s_m)}{1+s_m}}}{n^{\frac{1}{1+s_m}}} \left( \|f_m\|_{L_2(\Pi)} + \frac{s_m(3-s_m)}{1+s_m} r_m \|f_m\|_{\mathcal{H}_m} \right) \\ &\leq 3 \frac{r_m^{-\frac{s_m(3-s_m)}{1+s_m}}}{n^{\frac{1}{1+s_m}}} (\|f_m\|_{L_2(\Pi)} + s_m r_m \|f_m\|_{\mathcal{H}_m}), \end{aligned} \quad (\text{S-12})$$

where we used  $\frac{s_m(3-s_m)}{1+s_m} \leq 3s_m$  in the last inequality.

Now we define

$$\phi := \max \left( KL \left[ 2\tilde{C}_* + 1 + C_1 \right], K \left[ 2C_1 \tilde{C}_* + C_1 + C_1^2 \right] \right),$$

where  $\tilde{C}_*$  is a constant defined later in Lemma 11,  $C_1$  is the one introduced in Assumption 4,  $K$  is the universal constant appeared in Talagrand's concentration inequality (Proposition 6) and  $L$  is the one introduced in Assumption 1 to bound the magnitude of noise. Remind the definition of  $\eta(t)$ :

$$\eta(t) := \eta_n(t) = \max(1, \sqrt{t}, t/\sqrt{n}).$$

We define events  $\mathcal{E}_1(t)$  and  $\mathcal{E}_2(t')$  as

$$\mathcal{E}_1(t) = \left\{ \left| \frac{1}{n} \sum_{i=1}^n \epsilon_i f_m(x_i) \right| \leq \phi U_{n, s_m}^{(m)}(f_m) \eta(t), \forall f_m \in \mathcal{H}_m \ (m = 1, \dots, M) \right\}, \quad (\text{S-13})$$

$$\mathcal{E}_2(t') = \left\{ \left| \left\| \sum_{m=1}^M f_m \right\|_n^2 - \left\| \sum_{m=1}^M f_m \right\|_{L_2(\Pi)}^2 \right| \leq \phi \sqrt{n} \left( \sum_{m=1}^M U_{n,s_m}^{(m)}(f_m) \right)^2 \eta(t'), \right. \\ \left. \forall f_m \in \mathcal{H}_m \ (m = 1, \dots, M) \right\}. \quad (\text{S-14})$$

Using Lemmas 12 and 13 that will be shown in Appendix E, we see that the events  $\mathcal{E}_1(t)$  and  $\mathcal{E}_2(t')$  occur with probability no less than  $1 - \exp(-t)$  and  $1 - \exp(-t')$  respectively as in the following Lemma.

**Lemma 7.** *Under the Basic Assumption (Assumption 1), the Spectral Assumption (Assumption 2) and the Embedded Assumption (Assumption 4), the probabilities of  $\mathcal{E}_1(t)$  and  $\mathcal{E}_2(t')$  are bounded as*

$$P(\mathcal{E}_1(t)) \geq 1 - \exp(-t), \quad P(\mathcal{E}_2(t')) \geq 1 - \exp(-t').$$

*Proof.* Lemma 13 immediately gives  $P(\mathcal{E}_1(t)) \geq 1 - \exp(-t)$  by noticing  $\bar{\phi}$  in the statement of Lemma 13 satisfies  $\bar{\phi} \leq \phi$ . Moreover, since  $\phi'$  in the statement of Lemma 12 satisfies  $\phi' \leq \phi$ , we have  $P(\mathcal{E}_2(t')) \geq 1 - \exp(-t')$  by Lemma 12.  $\square$

Remind the definition (4) of  $\alpha_1, \alpha_2, \beta_1, \beta_2$ :

$$\alpha_1 = 3 \left( \sum_{m=1}^M \frac{r_m^{-2s_m}}{n} \right)^{\frac{1}{2}}, \quad \alpha_2 = 3 \left\| \left( \frac{s_m r_m^{1-s_m}}{\sqrt{n}} \right)_{m=1}^M \right\|_{\psi^*}, \\ \beta_1 = 3 \left( \sum_{m=1}^M \frac{r_m^{-\frac{2s_m(3-s_m)}{1+s_m}}}{n^{\frac{2}{1+s_m}}} \right)^{\frac{1}{2}}, \quad \beta_2 = 3 \left\| \left( \frac{s_m r_m^{\frac{(1-s_m)^2}{1+s_m}}}{n^{\frac{1}{1+s_m}}} \right)_{m=1}^M \right\|_{\psi^*}, \quad (\text{S-15})$$

for given reals  $\{r_m\}_{m=1}^M$ . The following theorem immediately gives Theorem 1.

**Theorem 8.** *Suppose Assumptions 1-4 are satisfied. Let  $\{r_m\}_{m=1}^M$  be arbitrary positive reals that can depend on  $n$ , and assume  $\lambda_1^{(n)} \geq \left(\frac{\alpha_2}{\alpha_1}\right)^2 + \left(\frac{\beta_2}{\beta_1}\right)^2$ . Then for all  $n$  and  $t'$  that satisfy  $\frac{\log(M)}{\sqrt{n}} \leq 1$  and  $\frac{4\phi\sqrt{n}}{\kappa_M} \max\{\alpha_1^2, \beta_1^2, \frac{M \log(M)}{n}\} \eta(t') \leq \frac{1}{12}$  and for all  $t \geq 1$ , we have*

$$\|\hat{f} - f^*\|_{L_2(\Pi)}^2 \leq \frac{24\eta(t)^2\phi^2}{\kappa_M} \left( \alpha_1^2 + \beta_1^2 + \frac{M \log(M)}{n} \right) + 4\lambda_1^{(n)} \|f^*\|_{\psi}^2.$$

with probability  $1 - \exp(-t) - \exp(-t')$ .

*Proof of Theorem 8.* By the assumption of the theorem, we can assume Lemma 7 holds, that is, the event  $\mathcal{E}_1(t) \cap \mathcal{E}_2(t')$  occurs with probability  $1 - \exp(-t) - \exp(-t')$ . Below we discuss on the event  $\mathcal{E}_1(t) \cap \mathcal{E}_2(t')$ .

Since  $y_i = f^*(x_i) + \epsilon_i$ , we have

$$\|\hat{f} - f^*\|_{L_2(\Pi)}^2 + \lambda_1^{(n)} \|\hat{f}\|_{\psi}^2 \\ \leq (\|\hat{f} - f^*\|_{L_2(\Pi)}^2 - \|\hat{f} - f^*\|_n^2) + \frac{2}{n} \sum_{i=1}^n \sum_{m=1}^M \epsilon_i (\hat{f}_m(x_i) - f_m^*(x_i)) + \lambda_1^{(n)} \|f^*\|_{\psi}^2.$$

Here on the event  $\mathcal{E}_2(t')$ , the above inequality gives

$$\|\hat{f} - f^*\|_{L_2(\Pi)}^2 + \lambda_1^{(n)} \|\hat{f}\|_{\psi}^2 \\ \leq \phi \sqrt{n} \left( \sum_{m=1}^M U_{n,s_m}^{(m)}(\hat{f}_m - f_m^*) \right)^2 \eta(t') + \frac{2}{n} \sum_{i=1}^n \sum_{m=1}^M \epsilon_i (\hat{f}_m(x_i) - f_m^*(x_i)) + \lambda_1^{(n)} \|f^*\|_{\psi}^2. \quad (\text{S-16})$$

Before we prove the statements, we show an upper bound of  $\sum_{m=1}^M U_{n,s_m}^{(m)}(f_m)$  required in the proof. By definition, we have

$$\begin{aligned}
& U_{n,s_m}^{(m)}(f_m) \\
&= 3 \left( \frac{r_m^{-s_m}}{\sqrt{n}} \vee \frac{r_m^{-\frac{s_m(3-s_m)}{1+s_m}}}{n^{\frac{1}{1+s_m}}} \right) (\|f_m\|_{L_2(\Pi)} + s_m r_m \|f_m\|_{\mathcal{H}_m}) + \sqrt{\frac{\log(M)}{n}} \|f_m\|_{L_2(\Pi)} \\
&\leq 3 \frac{r_m^{-s_m}}{\sqrt{n}} (\|f_m\|_{L_2(\Pi)} + s_m r_m \|f_m\|_{\mathcal{H}_m}) + 3 \frac{r_m^{-\frac{s_m(3-s_m)}{1+s_m}}}{n^{\frac{1}{1+s_m}}} (\|f_m\|_{L_2(\Pi)} + s_m r_m \|f_m\|_{\mathcal{H}_m}) \quad (\text{S-17}) \\
&\quad + \sqrt{\frac{\log(M)}{n}} \|f_m\|_{L_2(\Pi)}. \quad (\text{S-18})
\end{aligned}$$

Now the sum of the first term is bounded as

$$\begin{aligned}
& \sum_{m=1}^M 3 \frac{r_m^{-s_m}}{\sqrt{n}} (\|f_m\|_{L_2(\Pi)} + s_m r_m \|f_m\|_{\mathcal{H}_m}) \\
&= 3 \sum_{m=1}^M \frac{r_m^{-s_m}}{\sqrt{n}} \|f_m\|_{L_2(\Pi)} + 3 \sum_{m=1}^M \frac{s_m r_m^{1-s_m}}{\sqrt{n}} \|f_m\|_{\mathcal{H}_m} \\
&\leq 3 \left( \sum_{m=1}^M \frac{r_m^{-2s_m}}{n} \right)^{\frac{1}{2}} \left( \sum_{m=1}^M \|f_m\|_{L_2(\Pi)}^2 \right)^{\frac{1}{2}} + 3 \left\| \left( \frac{s_m r_m^{1-s_m}}{\sqrt{n}} \right)_{m=1}^M \right\|_{\psi^*} \|f\|_{\psi},
\end{aligned}$$

where we used Cauchy-Schwarz inequality and the duality of the norm in the last inequality. The sum of the second term of the RHS of Eq. (S-18) is bounded as

$$\begin{aligned}
& \sum_{m=1}^M 3 \frac{r_m^{-\frac{s_m(3-s_m)}{1+s_m}}}{n^{\frac{1}{1+s_m}}} (\|f_m\|_{L_2(\Pi)} + s_m r_m \|f_m\|_{\mathcal{H}_m}) \\
&= 3 \sum_{m=1}^M \frac{r_m^{-\frac{s_m(3-s_m)}{1+s_m}}}{n^{\frac{1}{1+s_m}}} \|f_m\|_{L_2(\Pi)} + 3 \sum_{m=1}^M \frac{s_m r_m^{\frac{(1-s_m)^2}{1+s_m}}}{n^{\frac{1}{1+s_m}}} \|f_m\|_{\mathcal{H}_m} \\
&\leq 3 \left( \sum_{m=1}^M \frac{r_m^{-\frac{2s_m(3-s_m)}{1+s_m}}}{n^{\frac{2}{1+s_m}}} \right)^{\frac{1}{2}} \left( \sum_{m=1}^M \|f_m\|_{L_2(\Pi)}^2 \right)^{\frac{1}{2}} + 3 \left\| \left( \frac{s_m r_m^{\frac{(1-s_m)^2}{1+s_m}}}{n^{\frac{1}{1+s_m}}} \right)_{m=1}^M \right\|_{\psi^*} \|f\|_{\psi},
\end{aligned}$$

where we used Cauchy-Schwarz inequality and the duality of the norm in the last inequality. Finally we have the following bound of the third term of the RHS of Eq. (S-18):

$$\sum_{m=1}^M \sqrt{\frac{\log(M)}{n}} \|f_m\|_{L_2(\Pi)} \leq \sqrt{\frac{M \log(M)}{n}} \left( \sum_{m=1}^M \|f_m\|_{L_2(\Pi)}^2 \right)^{\frac{1}{2}}.$$

Combine these inequalities and the relation  $\sum_{m=1}^M \|f_m\|_{L_2(\Pi)}^2 \leq \frac{1}{\kappa_M} \|f\|_{L_2(\Pi)}^2$  (Assumption 3) to obtain

$$\begin{aligned}
& \sum_{m=1}^M U_{n,s_m}^{(m)}(f_m) \\
&\leq 3 \left( \sum_{m=1}^M \frac{r_m^{-2s_m}}{n} \right)^{\frac{1}{2}} \frac{\|f\|_{L_2(\Pi)}}{\sqrt{\kappa_M}} + 3 \left\| \left( \frac{s_m r_m^{1-s_m}}{\sqrt{n}} \right)_{m=1}^M \right\|_{\psi^*} \|f\|_{\psi} \\
&\quad + 3 \left( \sum_{m=1}^M \frac{r_m^{-\frac{2s_m(3-s_m)}{1+s_m}}}{n^{\frac{2}{1+s_m}}} \right)^{\frac{1}{2}} \frac{\|f\|_{L_2(\Pi)}}{\sqrt{\kappa_M}} + 3 \left\| \left( \frac{s_m r_m^{\frac{(1-s_m)^2}{1+s_m}}}{n^{\frac{1}{1+s_m}}} \right)_{m=1}^M \right\|_{\psi^*} \|f\|_{\psi}
\end{aligned}$$

$$+ \sqrt{\frac{M \log(M)}{n}} \frac{\|f\|_{L_2(\Pi)}}{\sqrt{\kappa_M}}. \quad (\text{S-19})$$

Then by the definition (4) of  $\alpha_1, \alpha_2, \beta_1, \beta_2$ , we have

$$\begin{aligned} & \sum_{m=1}^M U_{n,s_m}^{(m)}(f_m) \\ & \leq \alpha_1 \frac{\|f\|_{L_2(\Pi)}}{\sqrt{\kappa_M}} + \alpha_2 \|f\|_\psi + \beta_1 \frac{\|f\|_{L_2(\Pi)}}{\sqrt{\kappa_M}} + \beta_2 \|f\|_\psi + \sqrt{\frac{M \log(M)}{n}} \frac{\|f\|_{L_2(\Pi)}}{\sqrt{\kappa_M}}. \end{aligned} \quad (\text{S-20})$$

*Step 1.*

By Eq. (S-20), the first term on the RHS of Eq. (S-16) can be upper bounded as

$$\begin{aligned} & \phi \sqrt{n} \left( \sum_{m=1}^M U_{n,s_m}^{(m)}(\hat{f}_m - f_m^*) \right)^2 \eta(t') \\ & \leq 4\phi \sqrt{n} \left( \alpha_1^2 \frac{\|\hat{f} - f^*\|_{L_2(\Pi)}^2}{\kappa_M} + \alpha_2^2 \|\hat{f} - f^*\|_\psi^2 + \beta_1^2 \frac{\|\hat{f} - f^*\|_{L_2(\Pi)}^2}{\kappa_M} + \right. \\ & \quad \left. \beta_2^2 \|\hat{f} - f^*\|_\psi^2 + \frac{M \log(M)}{n} \frac{\|\hat{f} - f^*\|_{L_2(\Pi)}^2}{\kappa_M} \right) \eta(t') \\ & \leq \frac{4\phi \sqrt{n}}{\kappa_M} \alpha_1^2 \eta(t') \left( \|\hat{f} - f^*\|_{L_2(\Pi)}^2 + \left( \frac{\alpha_2}{\alpha_1} \right)^2 \|\hat{f} - f^*\|_\psi^2 \right) \\ & \quad + \frac{4\phi \sqrt{n}}{\kappa_M} \beta_1^2 \eta(t') \left( \|\hat{f} - f^*\|_{L_2(\Pi)}^2 + \left( \frac{\beta_2}{\beta_1} \right)^2 \|\hat{f} - f^*\|_\psi^2 \right) \\ & \quad + \frac{4\phi \sqrt{n}}{\kappa_M} \frac{M \log(M)}{n} \eta(t') \|\hat{f} - f^*\|_{L_2(\Pi)}^2. \end{aligned}$$

By assumption, we have  $\frac{4\phi \sqrt{n}}{\kappa_M} \max\{\alpha_1^2, \beta_1^2, \frac{M \log(M)}{n}\} \eta(t') \leq \frac{1}{12}$ . Hence the RHS of the above inequality is bounded by

$$\begin{aligned} & \phi \sqrt{n} \left( \sum_{m=1}^M U_{n,s_m}^{(m)}(\hat{f}_m - f_m^*) \right)^2 \eta(t') \\ & \leq \frac{1}{4} \left\{ \|\hat{f} - f^*\|_{L_2(\Pi)}^2 + \left[ \left( \frac{\alpha_2}{\alpha_1} \right)^2 + \left( \frac{\beta_2}{\beta_1} \right)^2 \right] \|\hat{f} - f^*\|_\psi^2 \right\}. \end{aligned} \quad (\text{S-21})$$

*Step 2.* On the event  $\mathcal{E}_1(t)$ , we have

$$\begin{aligned} & \frac{2}{n} \sum_{i=1}^n \sum_{m=1}^M \epsilon_i(\hat{f}_m(x_i) - f_m^*(x_i)) \leq 2 \sum_{m=1}^M \eta(t) \phi U_{n,s_m}^{(m)}(\hat{f}_m - f_m^*) \\ & \leq 2\eta(t) \phi \left[ \alpha_1 \frac{\|\hat{f} - f^*\|_{L_2(\Pi)}}{\sqrt{\kappa_M}} + \alpha_2 \|\hat{f} - f^*\|_\psi + \beta_1 \frac{\|\hat{f} - f^*\|_{L_2(\Pi)}}{\sqrt{\kappa_M}} + \beta_2 \|\hat{f} - f^*\|_\psi \right. \\ & \quad \left. + \sqrt{\frac{M \log(M)}{n}} \frac{\|\hat{f} - f^*\|_{L_2(\Pi)}}{\sqrt{\kappa_M}} \right] \quad (\because \text{Eq. (S-19)}) \\ & \leq 2 \frac{\eta(t) \phi \alpha_1}{\sqrt{\kappa_M}} \left( \|\hat{f} - f^*\|_{L_2(\Pi)} + \frac{\alpha_2}{\alpha_1} \|\hat{f} - f^*\|_\psi \right) + 2 \frac{\eta(t) \phi \beta_1}{\sqrt{\kappa_M}} \left( \|\hat{f} - f^*\|_{L_2(\Pi)} + \frac{\beta_2}{\beta_1} \|\hat{f} - f^*\|_\psi \right) \\ & \quad + 2 \frac{\eta(t) \phi}{\sqrt{\kappa_M}} \sqrt{\frac{M \log(M)}{n}} \|\hat{f} - f^*\|_{L_2(\Pi)} \end{aligned}$$

$$\begin{aligned}
&\leq \frac{12\eta(t)^2\phi^2\alpha_1^2}{\kappa_M} + \frac{1}{24} \left( \|\hat{f} - f^*\|_{L_2(\Pi)} + \frac{\alpha_2}{\alpha_1} \|\hat{f} - f^*\|_\psi \right)^2 \\
&\quad + \frac{12\eta(t)^2\phi^2\beta_1^2}{\kappa_M} + \frac{1}{24} \left( \|\hat{f} - f^*\|_{L_2(\Pi)} + \frac{\beta_2}{\beta_1} \|\hat{f} - f^*\|_\psi \right)^2 \\
&\quad + \frac{6\eta(t)^2\phi^2}{\kappa_M} \frac{M \log(M)}{n} + \frac{1}{12} \|\hat{f} - f^*\|_{L_2(\Pi)}^2 \\
&\leq \frac{12\eta(t)^2\phi^2\alpha_1^2}{\kappa_M} + \frac{1}{12} \left[ \|\hat{f} - f^*\|_{L_2(\Pi)}^2 + \left( \frac{\alpha_2}{\alpha_1} \right)^2 \|\hat{f} - f^*\|_\psi^2 \right] \\
&\quad + \frac{12\eta(t)^2\phi^2\beta_1^2}{\kappa_M} + \frac{1}{12} \left[ \|\hat{f} - f^*\|_{L_2(\Pi)}^2 + \left( \frac{\beta_2}{\beta_1} \right)^2 \|\hat{f} - f^*\|_\psi^2 \right] \\
&\quad + \frac{6\eta(t)^2\phi^2}{\kappa_M} \frac{M \log(M)}{n} + \frac{1}{12} \|\hat{f} - f^*\|_{L_2(\Pi)}^2 \\
&\leq \frac{12\eta(t)^2\phi^2}{\kappa_M} \left( \alpha_1^2 + \beta_1^2 + \frac{M \log(M)}{n} \right) + \frac{1}{4} \left\{ \|\hat{f} - f^*\|_{L_2(\Pi)}^2 + \left[ \left( \frac{\alpha_2}{\alpha_1} \right)^2 + \left( \frac{\beta_2}{\beta_1} \right)^2 \right] \|\hat{f} - f^*\|_\psi^2 \right\}.
\end{aligned} \tag{S-22}$$

Step 3.

Substituting the inequalities (S-21) and (S-22) to Eq. (S-16), we obtain

$$\begin{aligned}
&\|\hat{f} - f^*\|_{L_2(\Pi)}^2 + \lambda_1^{(n)} \|\hat{f}\|_\psi^2 \\
&\leq \frac{12\eta(t)^2\phi^2}{\kappa_M} \left( \alpha_1^2 + \beta_1^2 + \frac{M \log(M)}{n} \right) + \frac{1}{2} \left\{ \|\hat{f} - f^*\|_{L_2(\Pi)}^2 + \left[ \left( \frac{\alpha_2}{\alpha_1} \right)^2 + \left( \frac{\beta_2}{\beta_1} \right)^2 \right] \|\hat{f} - f^*\|_\psi^2 \right\} \\
&\quad + \lambda_1^{(n)} \|f^*\|_\psi^2.
\end{aligned} \tag{S-23}$$

Now the term  $\|\hat{f} - f^*\|_\psi^2$  can be bounded as

$$\|\hat{f} - f^*\|_\psi^2 \leq \left( \|\hat{f}\|_\psi + \|f^*\|_\psi \right)^2 \leq 2 \left( \|\hat{f}\|_\psi^2 + \|f^*\|_\psi^2 \right),$$

where we used the triangular inequality for the mixed-norm with respect to  $\psi$ -norm  $\|\cdot\|_\psi$ . Thus, when  $\lambda_1^{(n)} \geq \left( \frac{\alpha_2}{\alpha_1} \right)^2 + \left( \frac{\beta_2}{\beta_1} \right)^2$ , Eq. (S-23) yields

$$\frac{1}{2} \|\hat{f} - f^*\|_{L_2(\Pi)}^2 \leq \frac{12\eta(t)^2\phi^2}{\kappa_M} \left( \alpha_1^2 + \beta_1^2 + \frac{M \log(M)}{n} \right) + 2\lambda_1^{(n)} \|f^*\|_\psi^2.$$

Therefore by multiplying 2 to both sides, we have

$$\|\hat{f} - f^*\|_{L_2(\Pi)}^2 \leq \frac{24\eta(t)^2\phi^2}{\kappa_M} \left( \alpha_1^2 + \beta_1^2 + \frac{M \log(M)}{n} \right) + 4\lambda_1^{(n)} \|f^*\|_\psi^2.$$

This gives the assertion.  $\square$

## E Bounding the Probabilities of $\mathcal{E}_1(t)$ and $\mathcal{E}_2(t')$

Here we derive bounds of the probabilities of the events  $\mathcal{E}_1(t)$  and  $\mathcal{E}_2(t')$  (see Eq. (S-13) and Eq. (S-14) for their definitions). The goal of this section is to derive Lemmas 12 and 13.

Using Propositions 6 and 5, we obtain the following ratio type uniform bound.

**Lemma 9.** *Under the Spectral Assumption (Assumption 2) and the Embedded Assumption (Assumption 4), there exists a constant  $C_{s_m}$  depending only on  $s_m$ ,  $c$  and  $C_1$  such that*

$$\mathbb{E} \left[ \sup_{f_m \in \mathcal{H}_m: \|f_m\|_{\mathcal{H}_m} = 1} \frac{|\frac{1}{n} \sum_{i=1}^n \sigma_i f_m(x_i)|}{U_{n,s_m}^{(m)}(f_m)} \right] \leq C_{s_m}.$$

*Proof of Lemma 9.* Let  $\mathcal{H}_m(\delta) := \{f_m \in \mathcal{H}_m \mid \|f_m\|_{\mathcal{H}_m} = 1, \|f_m\|_{L_2(\Pi)} \leq \delta\}$  and  $z = 2^{1/s_m} > 1$ . Define  $\tau := s_m r_m$ . Then by combining Propositions 4 and 5 with Assumption 4, we have

$$\begin{aligned}
& \mathbb{E} \left[ \sup_{f_m \in \mathcal{H}_m : \|f_m\|_{\mathcal{H}_m} = 1} \frac{|\frac{1}{n} \sum_{i=1}^n \sigma_i f_m(x_i)|}{U_{n,s_m}^{(m)}(f_m)} \right] \\
& \leq \mathbb{E} \left[ \sup_{f_m \in \mathcal{H}_m(\tau)} \frac{|\frac{1}{n} \sum_{i=1}^n \sigma_i f_m(x_i)|}{U_{n,s_m}^{(m)}(f_m)} \right] + \sum_{k=1}^{\infty} \mathbb{E} \left[ \sup_{f_m \in \mathcal{H}_m(\tau z^k) \setminus \mathcal{H}_m(\tau z^{k-1})} \frac{|\frac{1}{n} \sum_{i=1}^n \sigma_i f_m(x_i)|}{U_{n,s_m}^{(m)}(f_m)} \right] \\
& \leq C'_{s_m} \frac{\tau^{1-s_m} \tilde{c}_{s_m}^{s_m}}{\sqrt{n}} \vee \frac{C_1^{\frac{1-s_m}{1+s_m}} \tau^{\frac{(1-s_m)^2}{1+s_m}} \tilde{c}_{s_m}^{\frac{2s_m}{1+s_m}}}{\frac{1}{n^{\frac{1}{1+s_m}}}} \\
& \quad + \sum_{k=1}^{\infty} C'_{s_m} \frac{z^{k(1-s_m)} \tau^{1-s_m} \tilde{c}_{s_m}^{s_m}}{\sqrt{n}} \vee \frac{C_1^{\frac{1-s_m}{1+s_m}} z^{k \frac{(1-s_m)^2}{1+s_m}} \tau^{\frac{(1-s_m)^2}{1+s_m}} \tilde{c}_{s_m}^{\frac{2s_m}{1+s_m}}}{\frac{1}{n^{\frac{1}{1+s_m}}}} \\
& \leq \frac{C'_{s_m}}{3} \left( s_m^{-s_m} \tilde{c}_{s_m}^{s_m} \vee s_m^{-3s_m} C_1^{\frac{1-s_m}{1+s_m}} \tilde{c}_{s_m}^{\frac{2s_m}{1+s_m}} \right) \left( 1 + \sum_{k=1}^{\infty} z^{1-ks_m} \vee z^{1-k \frac{s_m(3-s_m)}{1+s_m}} \right) \\
& = \frac{C'_{s_m} s_m^{-3s_m}}{3} \left( \tilde{c}_{s_m}^{s_m} \vee C_1^{\frac{1-s_m}{1+s_m}} \tilde{c}_{s_m}^{\frac{2s_m}{1+s_m}} \right) \left( 1 + \frac{z^{1-s_m}}{1-z^{-s_m}} \vee \frac{z^{1-\frac{s_m(3-s_m)}{1+s_m}}}{1-z^{-\frac{s_m(3-s_m)}{1+s_m}}} \right) \\
& \leq 9C'_{s_m} \left( \tilde{c}_{s_m}^{s_m} \vee C_1^{\frac{1-s_m}{1+s_m}} \tilde{c}_{s_m}^{\frac{2s_m}{1+s_m}} \right) \left( 1 + \frac{z^{1-s_m}}{1-z^{-s_m}} \vee \frac{z^{1-\frac{s_m(3-s_m)}{1+s_m}}}{1-z^{-\frac{s_m(3-s_m)}{1+s_m}}} \right),
\end{aligned}$$

where we used  $s_m^{-s_m} \leq 3$  for  $0 < s_m$  in the last line. Thus by setting,  $C_{s_m} = 9C'_{s_m} \left( \tilde{c}_{s_m}^{s_m} \vee C_1^{\frac{1-s_m}{1+s_m}} \tilde{c}_{s_m}^{\frac{2s_m}{1+s_m}} \right) \left( 1 + \frac{z^{1-s_m}}{1-z^{-s_m}} \vee \frac{z^{1-\frac{s_m(3-s_m)}{1+s_m}}}{1-z^{-\frac{s_m(3-s_m)}{1+s_m}}} \right)$ , we obtain the assertion.  $\square$

This lemma immediately gives the following corollary.

**Corollary 10.** *Under the Spectral Assumption (Assumption 2) and the Embedded Assumption (Assumption 4), there exists a constant  $C_{s_m}$  depending only on  $s_m, c$  and  $C_1$  such that*

$$\mathbb{E} \left[ \sup_{f_m \in \mathcal{H}_m} \frac{|\frac{1}{n} \sum_{i=1}^n \sigma_i f_m(x_i)|}{U_{n,s_m}^{(m)}(f_m)} \right] \leq C_{s_m}.$$

*Proof.* By dividing the denominator and the numerator by the RKHS norm  $\|f_m\|_{\mathcal{H}_m}$ , we have

$$\begin{aligned}
& \mathbb{E} \left[ \sup_{f_m \in \mathcal{H}_m} \frac{|\frac{1}{n} \sum_{i=1}^n \sigma_i f_m(x_i)|}{U_{n,s_m}^{(m)}(f_m)} \right] \\
& = \mathbb{E} \left[ \sup_{f_m \in \mathcal{H}_m} \frac{|\frac{1}{n} \sum_{i=1}^n \sigma_i f_m(x_i)| / \|f_m\|_{\mathcal{H}_m}}{U_{n,s_m}^{(m)}(f_m) / \|f_m\|_{\mathcal{H}_m}} \right] \\
& = \mathbb{E} \left[ \sup_{f_m \in \mathcal{H}_m} \frac{|\frac{1}{n} \sum_{i=1}^n \sigma_i f_m(x_i) / \|f_m\|_{\mathcal{H}_m}|}{U_{n,s_m}^{(m)}(f_m / \|f_m\|_{\mathcal{H}_m})} \right] \\
& = \mathbb{E} \left[ \sup_{f_m \in \mathcal{H}_m : \|f_m\|_{\mathcal{H}_m} = 1} \frac{|\frac{1}{n} \sum_{i=1}^n \sigma_i f_m(x_i)|}{U_{n,s_m}^{(m)}(f_m)} \right] \\
& \leq C_{s_m}. \quad (\because \text{Lemma 9})
\end{aligned}$$

$\square$



**Lemma 11.** If  $\frac{\log(M)}{\sqrt{n}} \leq 1$ , then under the Spectral Assumption (Assumption 2) and the Embedded Assumption (Assumption 4) there exists a constant  $\tilde{C}_*$  depending only on  $\{s_m\}_{m=1}^M$ ,  $c$ ,  $C_1$  such that

$$\mathbb{E} \left[ \max_m \sup_{f_m \in \mathcal{H}_m} \frac{|\frac{1}{n} \sum_{i=1}^n \sigma_i f_m(x_i)|}{U_{n,s_m}^{(m)}(f_m)} \right] \leq \tilde{C}_*.$$

*Proof of Lemma 11.* First notice that the  $L_2(\Pi)$ -norm and the  $\infty$ -norm of  $\frac{\sigma_i f_m(x_i)}{U_{n,s_m}^{(m)}(f_m)}$  can be evaluated by

$$\left\| \frac{\sigma_i f_m(x_i)}{U_{n,s_m}^{(m)}(f_m)} \right\|_{L_2(\Pi)} = \frac{\|f_m\|_{L_2(\Pi)}}{U_{n,s_m}^{(m)}(f_m)} \leq \frac{\|f_m\|_{L_2(\Pi)}}{\sqrt{\frac{\log(M)}{n}} \|f_m\|_{L_2(\Pi)}} \leq \sqrt{\frac{n}{\log(M)}}, \quad (\text{S-24})$$

$$\left\| \frac{\sigma_i f_m(x_i)}{U_{n,s_m}^{(m)}(f_m)} \right\|_{\infty} = \frac{\|f_m\|_{\infty}}{U_{n,s_m}^{(m)}(f_m)} \leq \frac{C_1 \|f_m\|_{L_2(\Pi)}^{1-s_m} \|f_m\|_{\mathcal{H}_m}^{s_m}}{U_{n,s_m}^{(m)}(f_m)} \leq \frac{C_1}{3} \sqrt{n} \leq C_1 \sqrt{n}, \quad (\text{S-25})$$

where the second line is shown by using the relation (S-11). Let  $C_* := \max_m C_{s_m}$  where  $C_{s_m}$  is the constant appeared in Lemma 9. Thus Talagrand's inequality and Corollary 10 imply

$$\begin{aligned} & P \left( \max_m \sup_{f_m \in \mathcal{H}_m} \frac{|\frac{1}{n} \sum_{i=1}^n \sigma_i f_m(x_i)|}{U_{n,s_m}^{(m)}(f_m)} \geq K \left[ C_* + \sqrt{\frac{t}{\log(M)}} + \frac{C_1 t}{\sqrt{n}} \right] \right) \\ & \leq \sum_{m=1}^M P \left( \sup_{f_m \in \mathcal{H}_m} \frac{|\frac{1}{n} \sum_{i=1}^n \sigma_i f_m(x_i)|}{U_{n,s_m}^{(m)}(f_m)} \geq K \left[ C_* + \sqrt{\frac{t}{\log(M)}} + \frac{C_1 t}{\sqrt{n}} \right] \right) \\ & \leq \sum_{m=1}^M P \left( \sup_{f_m \in \mathcal{H}_m} \frac{|\frac{1}{n} \sum_{i=1}^n \sigma_i f_m(x_i)|}{U_{n,s_m}^{(m)}(f_m)} \geq K \left[ C_{s_m} + \sqrt{\frac{t}{\log(M)}} + \frac{C_1 t}{\sqrt{n}} \right] \right) \\ & \leq M e^{-t}. \end{aligned}$$

By setting  $t \leftarrow t + \log(M)$ , we obtain

$$P \left( \max_m \sup_{f_m \in \mathcal{H}_m} \frac{|\frac{1}{n} \sum_{i=1}^n \sigma_i f_m(x_i)|}{U_{n,s_m}^{(m)}(f_m)} \geq K \left[ C_* + \sqrt{\frac{t + \log(M)}{\log(M)}} + \frac{C_1(t + \log(M))}{\sqrt{n}} \right] \right) \leq e^{-t}$$

for all  $t \geq 0$ . Consequently the expectation of the max-sup term can be bounded as

$$\begin{aligned} & \mathbb{E} \left[ \max_m \sup_{f_m \in \mathcal{H}_m} \frac{|\frac{1}{n} \sum_{i=1}^n \sigma_i f_m(x_i)|}{U_{n,s_m}^{(m)}(f_m)} \right] \\ & \leq K \left[ C_* + 1 + \frac{C_1 \log(M)}{\sqrt{n}} \right] + \int_0^\infty K \left[ C_* + \sqrt{\frac{t + 1 + \log(M)}{\log(M)}} + \frac{C_1(t + 1 + \log(M))}{\sqrt{n}} \right] e^{-t} dt \\ & \leq 2K \left[ C_* + \sqrt{2} + \sqrt{\frac{\pi}{4 \log(M)}} + \frac{C_1(2 + \log(M))}{\sqrt{n}} \right] \leq \tilde{C}_*, \end{aligned}$$

where we used  $\sqrt{t + 1 + \log(M)} \leq \sqrt{t} + \sqrt{1 + \log(M)}$  and  $\int_0^\infty \sqrt{t} e^{-t} dt = \sqrt{\frac{\pi}{4}}$ ,  $\frac{\log(M)}{\sqrt{n}} \leq 1$ , and  $\tilde{C}_* = 2K[C_* + \sqrt{2} + \sqrt{\frac{\pi}{4}} + 3C_1]$ .  $\square$

**Lemma 12.** Suppose the Basic Assumption (Assumption 1), the Spectral Assumption (Assumption 2) and the Embedded Assumption (Assumption 4) hold. Define  $\bar{\phi} = KL \left[ 2\tilde{C}_* + 1 + C_1 \right]$ . If  $\frac{\log(M)}{\sqrt{n}} \leq 1$ , then the following holds

$$P \left( \max_m \sup_{f_m \in \mathcal{H}_m} \frac{|\frac{1}{n} \sum_{i=1}^n \epsilon_i f_m(x_i)|}{U_{n,s_m}^{(m)}(f_m)} \geq \bar{\phi} \eta(t) \right) \leq e^{-t}.$$

*Proof of Lemma 12.* By the contraction inequality [2, Theorem 4.12] and Lemma 11, we have

$$\mathbb{E} \left[ \max_m \sup_{f_m \in \mathcal{H}_m} \frac{|\frac{1}{n} \sum_{i=1}^n \epsilon_i f_m(x_i)|}{U_{n,s_m}^{(m)}(f_m)} \right] \leq 2\mathbb{E} \left[ \max_m \sup_{f_m \in \mathcal{H}_m} \frac{|\frac{1}{n} \sum_{i=1}^n \sigma_i \epsilon_i f_m(x_i)|}{U_{n,s_m}^{(m)}(f_m)} \right] \leq 2L\tilde{C}_*,$$

where we used  $\epsilon_i \leq L$  (Basic Assumption). Using this and Eq. (S-24) and Eq. (S-25), Talgrand's inequality gives

$$P \left( \max_m \sup_{f_m \in \mathcal{H}_m} \frac{|\frac{1}{n} \sum_{i=1}^n \epsilon_i f_m(x_i)|}{U_{n,s_m}^{(m)}(f_m)} \geq KL \left[ 2\tilde{C}_* + \sqrt{t} + \frac{C_1 t}{\sqrt{n}} \right] \right) \leq e^{-t}.$$

Thus we have

$$P \left( \max_m \sup_{f_m \in \mathcal{H}_m} \frac{|\frac{1}{n} \sum_{i=1}^n \epsilon_i f_m(x_i)|}{U_{n,s_m}^{(m)}(f_m)} \geq KL \left[ 2\tilde{C}_* + 1 + C_1 \right] \max \left( 1, \sqrt{t}, \frac{t}{\sqrt{n}} \right) \right) \leq e^{-t}.$$

Therefore by the definition of  $\bar{\phi}$  and  $\eta(t)$ , we obtain the assertion.  $\square$

**Lemma 13.** Suppose the Basic Assumption (Assumption 1), the Spectral Assumption (Assumption 2) and the Embedded Assumption (Assumption 4) hold. Let  $\bar{\phi}' = K[2C_1\tilde{C}_* + C_1 + C_1^2]$ . Then, if  $\frac{\log(M)}{\sqrt{n}} \leq 1$ , we have for all  $t \geq 0$

$$\left| \left\| \sum_{m=1}^M f_m \right\|_n^2 - \left\| \sum_{m=1}^M f_m \right\|_{L_2(\Pi)}^2 \right| \leq \phi' \sqrt{n} \left( \sum_{m=1}^M U_{n,s_m}^{(m)}(f_m) \right)^2 \eta(t),$$

for all  $f_m \in \mathcal{H}_m$  ( $m = 1, \dots, M$ ) with probability  $1 - \exp(-t)$ .

*Proof of Lemma 13.*

$$\begin{aligned} & \mathbb{E} \left[ \sup_{f_m \in \mathcal{H}_m} \frac{\left| \left\| \sum_{m=1}^M f_m \right\|_n^2 - \left\| \sum_{m=1}^M f_m \right\|_{L_2(\Pi)}^2 \right|}{\left( \sum_{m=1}^M U_{n,s_m}^{(m)}(f_m) \right)^2} \right] \\ & \leq 2\mathbb{E} \left[ \sup_{f_m \in \mathcal{H}_m} \frac{\left| \frac{1}{n} \sum_{i=1}^n \sigma_i (\sum_{m=1}^M f_m(x_i))^2 \right|}{\left( \sum_{m=1}^M U_{n,s_m}^{(m)}(f_m) \right)^2} \right] \\ & \leq \sup_{f_m \in \mathcal{H}_m} \frac{\left\| \sum_{m=1}^M f_m \right\|_\infty}{\sum_{m=1}^M U_{n,s_m}^{(m)}(f_m)} \times 2\mathbb{E} \left[ \sup_{f_m \in \mathcal{H}_m} \frac{\left| \frac{1}{n} \sum_{i=1}^n \sigma_i (\sum_{m=1}^M f_m(x_i)) \right|}{\sum_{m=1}^M U_{n,s_m}^{(m)}(f_m)} \right], \end{aligned} \quad (\text{S-26})$$

where we used the contraction inequality in the last line [2, Theorem 4.12]. Thus using Eq. (S-25), the RHS of the inequality (S-26) can be bounded as

$$\begin{aligned} & 2C_1 \sqrt{n} \mathbb{E} \left[ \sup_{f_m \in \mathcal{H}_m} \frac{\left| \frac{1}{n} \sum_{i=1}^n \sigma_i (\sum_{m=1}^M f_m(x_i)) \right|}{\sum_{m=1}^M U_{n,s_m}^{(m)}(f_m)} \right] \\ & \leq 2C_1 \sqrt{n} \mathbb{E} \left[ \sup_{f_m \in \mathcal{H}_m} \max_m \frac{\left| \frac{1}{n} \sum_{i=1}^n \sigma_i f_m(x_i) \right|}{U_{n,s_m}^{(m)}(f_m)} \right], \end{aligned}$$

where we used the relation

$$\frac{\sum_m a_m}{\sum_m b_m} \leq \max_m \left( \frac{a_m}{b_m} \right) \quad (\text{S-27})$$

for all  $a_m \geq 0$  and  $b_m \geq 0$  with a convention  $\frac{0}{0} = 0$ . By Lemma 11, the right hand side is upper bounded by  $2C_1\sqrt{n}\tilde{C}_*$ . Here we again apply Talagrand's concentration inequality, then we have

$$P\left(\sup_{f_m \in \mathcal{H}_m} \frac{\left|\left\|\sum_{m=1}^M f_m\right\|_n^2 - \left\|\sum_{m=1}^M f_m\right\|_{L_2(\Pi)}^2\right|}{\left(\sum_{m=1}^M U_{n,s_m}^{(m)}(f_m)\right)^2} \geq K \left[2C_1\tilde{C}_*\sqrt{n} + \sqrt{tn}C_1 + C_1^2t\right]\right) \leq e^{-t},$$

where we substituted the following upper bounds of  $B$  and  $U$ .

$$\begin{aligned} B &\leq \sup_{f_m \in \mathcal{H}_m} \mathbb{E} \left[ \left( \frac{(\sum_{m=1}^M f_m)^2}{\left(\sum_{m=1}^M U_{n,s_m}^{(m)}(f_m)\right)^2} \right)^2 \right] \\ &\leq \sup_{f_m \in \mathcal{H}_m} \mathbb{E} \left[ \frac{(\sum_{m=1}^M f_m)^2}{\left(\sum_{m=1}^M U_{n,s_m}^{(m)}(f_m)\right)^2} \frac{(\|\sum_{m=1}^M f_m\|_\infty)^2}{\left(\sum_{m=1}^M U_{n,s_m}^{(m)}(f_m)\right)^2} \right] \\ &\stackrel{(S-25)}{\leq} \sup_{f_m \in \mathcal{H}_m} \frac{\left(\sum_{m=1}^M \|f_m\|_{L_2(\Pi)}\right)^2}{\left(\sum_{m=1}^M U_{n,s_m}^{(m)}(f_m)\right)^2} \frac{(\sum_{m=1}^M C_1\sqrt{n}U_{n,s_m}^{(m)}(f_m))^2}{\left(\sum_{m=1}^M U_{n,s_m}^{(m)}(f_m)\right)^2} \\ &\stackrel{(S-24)}{\leq} C_1^2 n^2 \frac{1}{\log(M)} \leq C_1^2 n^2, \end{aligned}$$

where in the second inequality we used the relation

$$\mathbb{E}[(\sum_{m=1}^M f_m)^2] = \mathbb{E}[\sum_{m,m'=1}^M f_m f_{m'}] \leq \sum_{m,m'=1}^M \|f_m\|_{L_2(\Pi)} \|f_{m'}\|_{L_2(\Pi)} = (\sum_{m=1}^M \|f_m\|_{L_2(\Pi)})^2$$

and in the third and forth inequality we used Eq. (S-25) and Eq. (S-24) with Eq.(S-27) respectively. Here we again use Eq. (S-24) with Eq.(S-27) to obtain

$$U = \sup_{f_m \in \mathcal{H}_m} \left\| \frac{(\sum_{m=1}^M f_m)^2}{\left(\sum_{m=1}^M U_{n,s_m}^{(m)}(f_m)\right)^2} \right\|_\infty \leq C_1^2 n.$$

Therefore the above inequality implies the following inequality

$$\sup_{f_m \in \mathcal{H}_m} \frac{\left|\left\|\sum_{m=1}^M f_m\right\|_n^2 - \left\|\sum_{m=1}^M f_m\right\|_{L_2(\Pi)}^2\right|}{\left(\sum_{m=1}^M U_{n,s_m}^{(m)}(f_m)\right)^2} \leq K \left[2C_1\tilde{C}_s + C_1 + C_1^2\right] \sqrt{n} \max(1, \sqrt{t}, t/\sqrt{n}),$$

with probability  $1 - \exp(-t)$ . Remind  $\bar{\phi}' = K \left[2C_1\tilde{C}_* + C_1 + C_1^2\right]$ , then we obtain the assertion.  $\square$

## F Proof of Theorem 3 (minimax learning rate)

Let the  $\delta$ -packing number  $Q(\delta, \mathcal{H}, L_2(\Pi))$  of a function class  $\mathcal{H}$  be the largest number of functions  $\{f_1, \dots, f_Q\} \subseteq \mathcal{H}$  such that  $\|f_i - f_j\|_{L_2(\Pi)} \geq \delta$  for all  $i \neq j$ .

*Proof of Theorem 3.* The proof utilizes the techniques developed by [3, 4] that applied the information theoretic technique developed by [7] to the MKL settings. To simplify the notation, we write  $\mathcal{F} := \mathcal{H}_\psi(R)$ ,  $N(\varepsilon, \mathcal{H}) := N(\varepsilon, \mathcal{H}, L_2(\Pi))$  and  $Q(\varepsilon, \mathcal{H}) := Q(\varepsilon, \mathcal{H}, L_2(\Pi))$ . It can be easily shown that  $Q(2\varepsilon, \mathcal{F}) \leq N(2\varepsilon, \mathcal{F}) \leq Q(\varepsilon, \mathcal{F})$ . Here due to Theorem 15 of [29], Assumption 5 yields

$$\log N(\varepsilon, \tilde{\mathcal{H}}(1)) \sim \varepsilon^{-2s}. \quad (\text{S-28})$$

We utilize the following inequality given by Lemma 3 of [3]:

$$\min_{\hat{f}} \max_{f^* \in \mathcal{H}_\psi(R_p)} \mathbb{E} \|\hat{f} - f^*\|_{L_2(\Pi)}^2 \geq \frac{\delta_n^2}{4} \left( 1 - \frac{\log N(\varepsilon_n, \mathcal{F}) + n\varepsilon_n^2/2\sigma^2 + \log 2}{\log Q(\delta_n, \mathcal{F})} \right).$$

First we show the assertion for the  $\ell_\infty$ -norm ball:  $\mathcal{H}_\psi(R) = \mathcal{H}_{\ell_\infty}(R) := \left\{ f = \sum_{m=1}^M f_m \mid \max_{1 \leq m \leq M} \|f_m\|_{\mathcal{H}_m} \leq R \right\}$ . In this situation, there is a constant  $C$  that depends only  $s$  such that

$$\log Q(\delta, \mathcal{F}) \geq CM \log Q(\delta/\sqrt{M}, \tilde{\mathcal{H}}(R)), \quad \log N(\varepsilon, \mathcal{F}) \leq M \log N(\varepsilon/\sqrt{M}, \tilde{\mathcal{H}}(R)),$$

(this is shown in Lemma 5 of [4], but we give the proof in Lemma 14 for completeness). Using this expression, the minimax-learning rate is bounded as

$$\min_{\hat{f}} \max_{f^* \in \mathcal{H}_{\ell_p}(R_p)} \mathbb{E} \|\hat{f} - f^*\|_{L_2(\Pi)}^2 \geq \frac{\delta_n^2}{4} \left( 1 - \frac{M \log N(\varepsilon_n/\sqrt{M}, \tilde{\mathcal{H}}(R)) + n\varepsilon_n^2/2\sigma^2 + \log 2}{CM \log Q(\delta_n/\sqrt{M}, \tilde{\mathcal{H}}(R))} \right).$$

Here we choose  $\varepsilon_n$  and  $\delta_n$  to satisfy the following relations:

$$\frac{n}{2\sigma^2} \varepsilon_n^2 \leq M \log N(\varepsilon_n/\sqrt{M}, \tilde{\mathcal{H}}(R)), \quad (\text{S-29})$$

$$M \log N(\varepsilon_n/\sqrt{M}, \tilde{\mathcal{H}}(R)) \geq \log 2, \quad (\text{S-30})$$

$$4 \log N(\varepsilon_n/\sqrt{M}, \tilde{\mathcal{H}}(R)) \leq C \log Q(\delta_n/\sqrt{M}, \tilde{\mathcal{H}}(R)). \quad (\text{S-31})$$

With  $\varepsilon_n$  and  $\delta_n$  that satisfy the above relations (S-29) and (S-31), we have

$$\min_{\hat{f}} \max_{f^* \in \mathcal{H}_{\ell_p}(R_p)} \mathbb{E} \|\hat{f} - f^*\|_{L_2(\Pi)}^2 \geq \frac{\delta_n^2}{16}. \quad (\text{S-32})$$

By Eq. (S-28), the relation (S-29) can be rewritten as

$$\frac{n}{2\sigma^2} \varepsilon_n^2 \leq CM \left( \frac{\varepsilon_n}{R\sqrt{M}} \right)^{-2s}.$$

It is sufficient to impose

$$\varepsilon_n^2 \leq Cn^{-\frac{1}{1+s}} MR^{\frac{2s}{1+s}}, \quad (\text{S-33})$$

with a constant  $C$ . Since we have assumed that  $n > \frac{\bar{c}^2 M^2}{R^2 \|\mathbf{1}\|_{\psi^*}^2}$  ( $= \frac{1}{R^2}$  for  $\|\cdot\|_\psi = \|\cdot\|_{\ell_\infty}$ ), the conditions (S-30) can be satisfied if the constant  $C$  in Eq. (S-33) is taken sufficiently small so that we have

$$\log 2 \leq \log N(\varepsilon_n/\sqrt{M}, \tilde{\mathcal{H}}(R)) \sim \left( \frac{\varepsilon_n}{R\sqrt{M}} \right)^{-2s}. \quad (\text{S-34})$$

The relation (S-31) can be satisfied by taking  $\delta_n = c\varepsilon_n$  with an appropriately chosen constant  $c$ . Thus Eq. (S-32) gives

$$\min_{\hat{f}} \max_{f^* \in \mathcal{H}_{\ell_p}(R_p)} \mathbb{E} \|\hat{f} - f^*\|_{L_2(\Pi)}^2 \geq Cn^{-\frac{1}{1+s}} MR^{\frac{2s}{1+s}}, \quad (\text{S-35})$$

with a constant  $C$ . This gives the assertion for  $p = \infty$ .

Finally we show the assertion for general isotropic  $\psi$ -norm  $\|\cdot\|_\psi$ . To show that, we prove that  $\mathcal{H}_{\ell_\infty}(R\|\mathbf{1}\|_{\psi^*}/(\bar{c}M)) \subset \mathcal{H}_\psi(R)$ . This is true if  $\frac{R\|\mathbf{1}\|_{\psi^*}}{\bar{c}M} \mathbf{1} \in \mathcal{H}_\psi(R)$  because of the second condition of the definition (11) of isotropic property. By the isotropic property, the  $\psi$ -norm of  $\frac{R\|\mathbf{1}\|_{\psi^*}}{\bar{c}M} \mathbf{1}$  is bounded as

$$\left\| \frac{R\|\mathbf{1}\|_{\psi^*}}{\bar{c}M} \mathbf{1} \right\|_\psi = \frac{R\|\mathbf{1}\|_{\psi^*}}{\bar{c}M} \|\mathbf{1}\|_\psi \stackrel{\text{isotropic}}{\leq} \frac{R}{\bar{c}M} \bar{c}M = R.$$

Thus we have  $\frac{R\|\mathbf{1}\|_{\psi^*}}{\bar{c}M} \mathbf{1} \in \mathcal{H}_\psi(R)$  and thus  $\mathcal{H}_{\ell_\infty}(R\|\mathbf{1}\|_{\psi^*}/(\bar{c}M)) \subset \mathcal{H}_\psi(R)$ . Therefore we have

$$\min_{\hat{f}} \max_{f^* \in \mathcal{H}_\psi(R)} \mathbb{E} \|\hat{f} - f^*\|_{L_2(\Pi)}^2 \geq \min_{\hat{f}} \max_{f^* \in \mathcal{H}_{\ell_\infty}(R\|\mathbf{1}\|_{\psi^*}/(\bar{c}M))} \mathbb{E} \|\hat{f} - f^*\|_{L_2(\Pi)}^2$$

$$\geq C n^{-\frac{1}{1+s}} M \left( \frac{R \|\mathbf{1}\|_{\psi^*}}{\bar{c}M} \right)^{\frac{2s}{1+s}}, \quad (\because \text{Eq. (S-35)}).$$

Note that due to the condition  $n > \frac{\bar{c}^2 M^2}{R^2 \|\mathbf{1}\|_{\psi^*}^2}$ , Eq. (S-35) is still valid under the condition that  $\frac{R \|\mathbf{1}\|_{\psi^*}}{\bar{c}M}$  is substituted into  $R$  in Eq. (S-35) (more precisely, Eq. (S-34) is valid). Resetting  $C \leftarrow C \bar{c}^{-\frac{2s}{1+s}}$ , we obtain the assertion.  $\square$

**Lemma 14.** *There is a constant  $C$  such that*

$$\log Q(\delta, \mathcal{H}_\infty(R)) \geq CM \log Q(\delta/\sqrt{M}, \tilde{\mathcal{H}}(R)),$$

for sufficiently small  $\delta$ .

*Proof.* The proof is analogous to that of Lemma 5 in [4]. We describe the outline of the proof. Let  $N = Q(\sqrt{2}\delta/\sqrt{M}, \tilde{\mathcal{H}}(R))$  and  $\{f_m^1, \dots, f_m^N\}$  be a  $\sqrt{2}\delta/\sqrt{M}$ -packing of  $\mathcal{H}_m(R)$ . Then we can construct a function class  $\Upsilon$  as

$$\Upsilon = \left\{ f^{\mathbf{j}} = \sum_{m=1}^M f_m^{j_m} \mid \mathbf{j} = (j_1, \dots, j_M) \in \{1, \dots, N\}^M \right\}.$$

We denote by  $[N] := \{1, \dots, N\}$ . For two functions  $f^{\mathbf{j}}, f^{\mathbf{j}'} \in \Upsilon$ , we have by the construction

$$\|f^{\mathbf{j}} - f^{\mathbf{j}'}\|_{L_2(\Pi)}^2 = \sum_{m=1}^M \|f_m^{j_m} - f_m^{j'_m}\|_{L_2(\Pi)}^2 \geq \frac{2\delta^2}{M} \sum_{m=1}^M \mathbf{1}[j_m \neq j'_m].$$

Thus, it suffices to construct a sufficiently large subset  $A \subset [N]^M$  such that all different pairs  $\mathbf{j}, \mathbf{j}' \in A$  have at least  $M/2$  of Hamming distance  $d_H(\mathbf{j}, \mathbf{j}') := \sum_{m=1}^M \mathbf{1}[j_m \neq j'_m]$ .

Now we define  $d_H(A, \mathbf{j}) := \min_{\mathbf{j}' \in A} d_H(\mathbf{j}', \mathbf{j})$ . If  $|A|$  satisfies

$$\left| \left\{ \mathbf{j} \in [N]^M \mid d_H(A, \mathbf{j}) \leq \frac{M}{2} \right\} \right| < |[N]^M| = N^M, \quad (\text{S-36})$$

then there exists a member  $\mathbf{j}' \in [N]^M$  such that  $\mathbf{j}'$  is more than  $\frac{M}{2}$  away from  $A$  with respect to  $d_H$ , i.e.  $d_H(A, \mathbf{j}') > \frac{M}{2}$ . That is, we can add  $\mathbf{j}'$  to  $A$  as long as Eq. (S-36) holds. Now since

$$\left| \left\{ \mathbf{j} \in [N]^M \mid d_H(A, \mathbf{j}) \leq \frac{M}{2} \right\} \right| \leq |A| \binom{M}{M/2} N^{M/2}, \quad (\text{S-37})$$

Eq. (S-36) holds as long as  $A$  satisfies

$$|A| \leq \frac{1}{2} \frac{N^M}{\binom{M}{M/2} N^{M/2}} =: Q^*.$$

The logarithm of  $Q^*$  can be evaluated as follows

$$\begin{aligned} \log Q^* &= \log \left( \frac{1}{2} \frac{N^M}{\binom{M}{M/2} N^{M/2}} \right) = M \log N - \log 2 - \log \binom{M}{M/2} - \frac{M}{2} \log N \\ &\geq \frac{M}{2} \log N - \log 2 - \log 2^M \geq \frac{M}{2} \log \frac{N}{16}. \end{aligned}$$

There exists a constant  $C$  such that  $N = Q(\sqrt{2}\delta/\sqrt{M}, \tilde{\mathcal{H}}(R)) \geq CQ(\delta/\sqrt{M}, \tilde{\mathcal{H}}(R))$  because  $\log Q(\delta, \tilde{\mathcal{H}}(R)) \sim \left(\frac{\delta}{R}\right)^{-2s}$ . Thus we obtain the assertion for sufficiently large  $N$ .  $\square$

## G Proof of Technical Lemmas

### G.1 Proof of Lemma 2

Remind that Eq. (6) gives

$$\begin{aligned} & \|\hat{f} - f^*\|_{L_2(\Pi)}^2 \\ &= O_p \left( \min_{\substack{\{r_m\}_{m=1}^M: \\ r_m > 0}} \left\{ \alpha_1^2 + \beta_1^2 + \left[ \left( \frac{\alpha_2}{\alpha_1} \right)^2 + \left( \frac{\beta_2}{\beta_1} \right)^2 \right] \|f^*\|_\psi^2 + \frac{M \log(M)}{n} \right\} \right). \end{aligned} \quad (\text{S-38})$$

We derive an upper bound of the right hand side by adding a constraint  $r_m = r$  ( $\forall m$ ). Since  $s_m = s$  ( $\forall m$ ), under the constraint  $r_m = r$  ( $\forall m$ ) we have

$$\begin{aligned} \frac{\alpha_2}{\alpha_1} &= \frac{3 \frac{s r^{1-s}}{\sqrt{n}} \|\mathbf{1}\|_{\psi^*}}{3 \sqrt{M \frac{r^{-2s}}{n}}} = \frac{1}{\sqrt{M}} s r \|\mathbf{1}\|_{\psi^*}, \\ \frac{\beta_2}{\beta_1} &= \frac{3 \frac{s r^{\frac{(1-s)^2}{1+s}}}{n^{\frac{1}{1+s}}} \|\mathbf{1}\|_{\psi^*}}{3 \sqrt{M \frac{r^{-\frac{2s(3-s)}{1+s}}}{n^{\frac{2}{1+s}}}}} = \frac{1}{\sqrt{M}} s r \|\mathbf{1}\|_{\psi^*}, \end{aligned}$$

Thus  $\frac{\alpha_2}{\alpha_1} = \frac{\beta_2}{\beta_1}$ , and Eq. (S-38) becomes

$$\|\hat{f} - f^*\|_{L_2(\Pi)}^2 = O_p \left( \min_{\substack{r > 0, \\ r_m = r}} \left\{ \alpha_1^2 + \beta_1^2 + 2 \frac{1}{M} s^2 r^2 \|\mathbf{1}\|_{\psi^*}^2 \|f^*\|_\psi^2 + \frac{M \log(M)}{n} \right\} \right). \quad (\text{S-39})$$

By the definition, we see that the first two terms are monotonically decreasing function with respect to  $r$  and the third term is monotonically increasing function. The minimum of the right hand side is attained by balancing  $\alpha_1^2 + \beta_1^2$  and  $2 \frac{1}{M} s^2 r^2 \|\mathbf{1}\|_{\psi^*}^2 \|f^*\|_\psi^2$ . Since  $\alpha_1^2 + \beta_1^2 \leq 2 \max(\alpha_1^2, \beta_1^2)$ , Eq. (S-39) indicates that

$$\|\hat{f} - f^*\|_{L_2(\Pi)}^2 \leq O_p \left( \min_{\substack{r > 0, \\ r_m = r}} \left\{ 2 \max(\alpha_1^2, \beta_1^2) + 2 \frac{1}{M} s^2 r^2 \|\mathbf{1}\|_{\psi^*}^2 \|f^*\|_\psi^2 + \frac{M \log(M)}{n} \right\} \right). \quad (\text{S-40})$$

To balance the first term and the second term, we need to consider two situations:  $\alpha_1^2 = \frac{1}{M} s^2 r^2 \|\mathbf{1}\|_{\psi^*}^2 \|f^*\|_\psi^2$  or  $\beta_1^2 = \frac{1}{M} s^2 r^2 \|\mathbf{1}\|_{\psi^*}^2 \|f^*\|_\psi^2$ .

First we balance the terms  $\alpha_1^2$  and  $\frac{1}{M} s^2 r^2 \|\mathbf{1}\|_{\psi^*}^2 \|f^*\|_\psi^2$  under the restriction that  $r_m = r$  ( $\forall m$ ):

$$\begin{aligned} \alpha_1^2 &= \frac{1}{M} s^2 r^2 \|\mathbf{1}\|_{\psi^*}^2 \|f^*\|_\psi^2 \\ \Leftrightarrow 9M \frac{r^{-2s}}{n} &= \frac{1}{M} s^2 r^2 \|\mathbf{1}\|_{\psi^*}^2 \|f^*\|_\psi^2 \\ \Leftrightarrow r^{-1} &= (s/3)^{\frac{1}{1+s}} M^{-\frac{1}{1+s}} n^{\frac{1}{2(1+s)}} (\|\mathbf{1}\|_{\psi^*} \|f^*\|_\psi)^{\frac{1}{1+s}}. \end{aligned}$$

For this  $r$ , we obtain

$$\begin{aligned} \alpha_1^2 &= 9M \frac{r^{-2s}}{n} \\ &= 9^{\frac{1}{1+s}} s^{\frac{2s}{1+s}} M^{1-\frac{2s}{1+s}} n^{-\frac{1}{1+s}} (\|\mathbf{1}\|_{\psi^*} \|f^*\|_\psi)^{\frac{2s}{1+s}} \leq 9M^{1-\frac{2s}{1+s}} n^{-\frac{1}{1+s}} (\|\mathbf{1}\|_{\psi^*} \|f^*\|_\psi)^{\frac{2s}{1+s}}, \end{aligned}$$

where we used  $s^{\frac{2s}{1+s}} \leq 1$  and  $9^{\frac{1}{1+s}} \leq 9$  in the last inequality.

Next we balance the terms  $\beta_1^2$  and  $\frac{1}{M} s^2 r^2 \|\mathbf{1}\|_{\psi^*}^2 \|f^*\|_\psi^2$  under the restriction that  $r_m = r$  ( $\forall m$ ):

$$\beta_1^2 = \frac{1}{M} s^2 r^2 \|\mathbf{1}\|_{\psi^*}^2 \|f^*\|_\psi^2$$

$$\begin{aligned}
&\Leftrightarrow 9M \frac{r^{-\frac{2s(3-s)}{1+s}}}{n^{\frac{2}{1+s}}} = \frac{1}{M} s^2 r^2 \|\mathbf{1}\|_{\psi^*}^2 \|f^*\|_{\psi}^2 \\
&\Leftrightarrow r^{-1} = (s/3)^{\frac{1+s}{1+4s-s^2}} M^{-\frac{1+s}{1+4s-s^2}} n^{\frac{1}{1+4s-s^2}} (\|\mathbf{1}\|_{\psi^*} \|f^*\|_{\psi})^{\frac{1+s}{1+4s-s^2}}.
\end{aligned}$$

For this  $r$ , we obtain

$$\begin{aligned}
\beta_1^2 &= 9M \frac{r^{-\frac{2s(3-s)}{1+s}}}{n^{\frac{2}{1+s}}} \\
&= 9 \frac{1+s}{1+4s-s^2} s^{\frac{2s(3-s)}{1+4s-s^2}} M^{-\frac{1-2s+s^2}{1+4s-s^2}} n^{-\frac{2}{1+4s-s^2}} (\|\mathbf{1}\|_{\psi^*} \|f^*\|_{\psi})^{\frac{2s(3-s)}{1+4s-s^2}} \\
&\leq 9M^{\frac{1-2s+s^2}{1+4s-s^2}} n^{-\frac{2}{1+4s-s^2}} (\|\mathbf{1}\|_{\psi^*} \|f^*\|_{\psi})^{\frac{2s(3-s)}{1+4s-s^2}},
\end{aligned}$$

where we used  $s^{\frac{2s(3-s)}{1+4s-s^2}} \leq 1$  and  $9 \frac{1+s}{1+4s-s^2} \leq 9$  in the last inequality.

Therefore the right hand side of Eq. (S-40) is further bounded as

$$\begin{aligned}
&\|\hat{f} - f^*\|_{L_2(\Pi)}^2 \\
&\leq O_p \left( 4 \max \left\{ 9M^{1-\frac{2s}{1+s}} n^{-\frac{1}{1+s}} (\|\mathbf{1}\|_{\psi^*} \|f^*\|_{\psi})^{\frac{2s}{1+s}}, \right. \right. \\
&\quad \left. \left. 9M^{\frac{1-2s+s^2}{1+4s-s^2}} n^{-\frac{2}{1+4s-s^2}} (\|\mathbf{1}\|_{\psi^*} \|f^*\|_{\psi})^{\frac{2s(3-s)}{1+4s-s^2}} \right\} + \frac{M \log(M)}{n} \right) \\
&= O_p \left( M^{1-\frac{2s}{1+s}} n^{-\frac{1}{1+s}} (\|\mathbf{1}\|_{\psi^*} \|f^*\|_{\psi})^{\frac{2s}{1+s}} + \right. \\
&\quad \left. M^{\frac{(1-s)^2}{1+4s-s^2}} n^{-\frac{2}{1+4s-s^2}} (\|\mathbf{1}\|_{\psi^*} \|f^*\|_{\psi})^{\frac{2s(3-s)}{1+4s-s^2}} + \frac{M \log(M)}{n} \right).
\end{aligned}$$

Finally, if  $n \geq (\|\mathbf{1}\|_{\psi^*} \|f^*\|_{\psi}/M)^{\frac{4s}{1-s}}$ , the first term of the right hand side of this bound is not less than the second term:

$$M^{1-\frac{2s}{1+s}} n^{-\frac{1}{1+s}} (\|\mathbf{1}\|_{\psi^*} \|f^*\|_{\psi})^{\frac{2s}{1+s}} \geq M^{\frac{(1-s)^2}{1+4s-s^2}} n^{-\frac{2}{1+4s-s^2}} (\|\mathbf{1}\|_{\psi^*} \|f^*\|_{\psi})^{\frac{2s(3-s)}{1+4s-s^2}}.$$

Thus we obtain the assertion.

## References

- [1] O. Bousquet. A Bennett concentration inequality and its application to suprema of empirical process. *C. R. Acad. Sci. Paris Ser. I Math.*, 334:495–500, 2002.
- [2] M. Ledoux and M. Talagrand. *Probability in Banach Spaces. Isoperimetry and Processes*. Springer, New York, 1991. MR1102015.
- [3] G. Raskutti, M. Wainwright, and B. Yu. Lower bounds on minimax rates for nonparametric regression with additive sparsity and smoothness. In *Advances in Neural Information Processing Systems 22*, pages 1563–1570. MIT Press, Cambridge, MA, 2009.
- [4] G. Raskutti, M. Wainwright, and B. Yu. Minimax-optimal rates for sparse additive models over kernel classes via convex programming. Technical report, 2010. arXiv:1008.3654.
- [5] I. Steinwart. *Support Vector Machines*. Springer, 2008.
- [6] M. Talagrand. New concentration inequalities in product spaces. *Inventiones Mathematicae*, 126:505–563, 1996.
- [7] Y. Yang and A. Barron. Information-theoretic determination of minimax rates of convergence. *The Annals of Statistics*, 27(5):1564–1599, 1999.
